# Supplementary material for: Semi-continuous multi-step synthesis of lamivudine
Source: Royal Society of Chemistry journal article supplement (doi:10.1039/c7ob00480j), 2017-01-01

## Semi-continuous multi-step synthesis of lamivudine

Devender Mandala, Sravanthi Chada and Paul Watts\*

Nelson Mandela Metropolitan University, University Way, Port Elizabeth, 6031,  
South Africa.

Corresponding author: [Paul.Watts@nmmu.ac.za](mailto:Paul.Watts@nmmu.ac.za)

### CONTENTS:

#### Copies of NMR & HPLC Spectra:

1. (2*R*,5*R*)-((1*R*,2*S*,5*R*)-2-isopropyl-5-methylcyclohexyl) 5-hydroxy-1,3-oxathiolane-2-carboxylate **5** S2-S3
2. (2*R*,5*R*)-((1*R*,2*S*,5*R*)-2-isopropyl-5-methylcyclohexyl) 5-acetoxy-1,3-oxathiolane-2-carboxylate **7** S4-S5
3. (1*R*,2*S*,5*R*)-2-isopropyl-5-methylcyclohexyl(2*R*,5*S*)-5-(4-amino-2-oxo-1,2-dihydro-1-pyrimidinyl)-1,3-oxathialane-2-carboxylate **9** S6-S7
4. 4-amino-1-((2*R*,5*S*)-2-(hydroxymethyl)-1,3-oxathiolan-5-yl)pyrimidin-2(1*H*)-one **1** S8-S9
5. Chiral HPLC spectrum of lamivudine S10

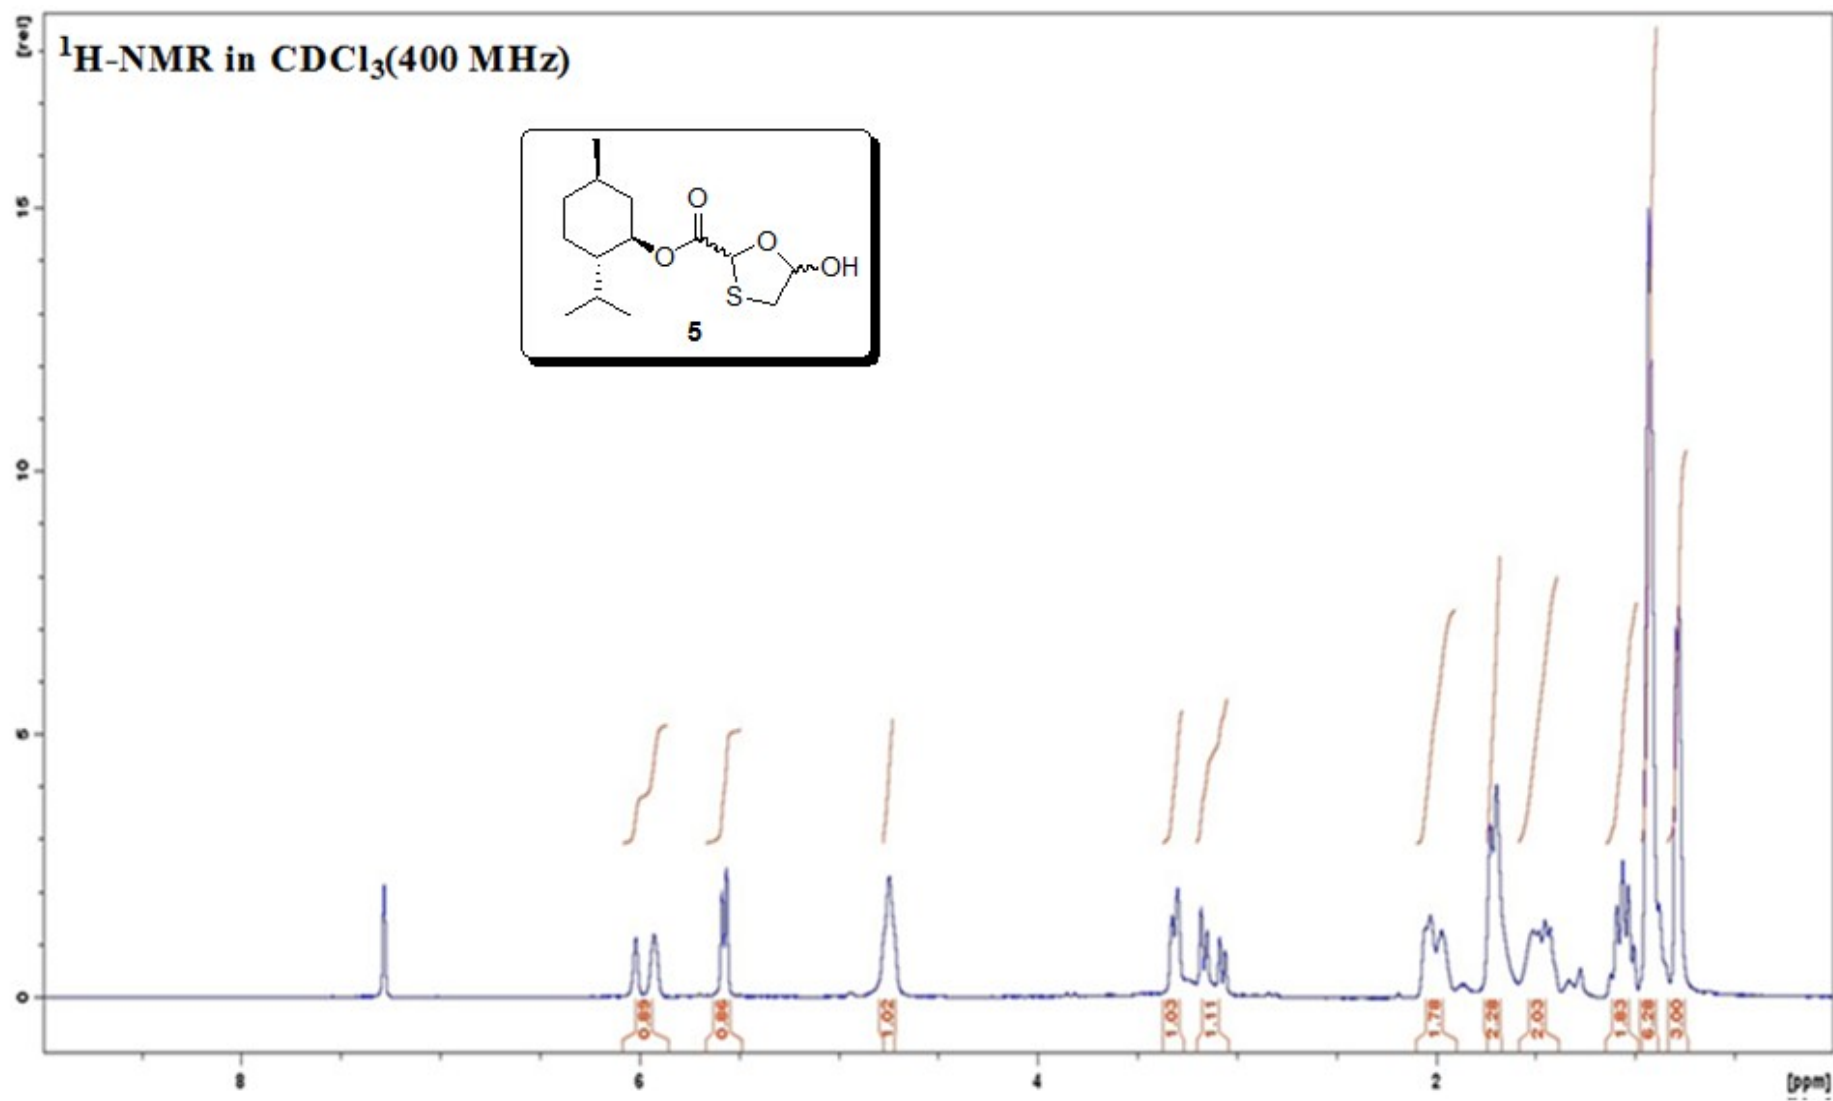

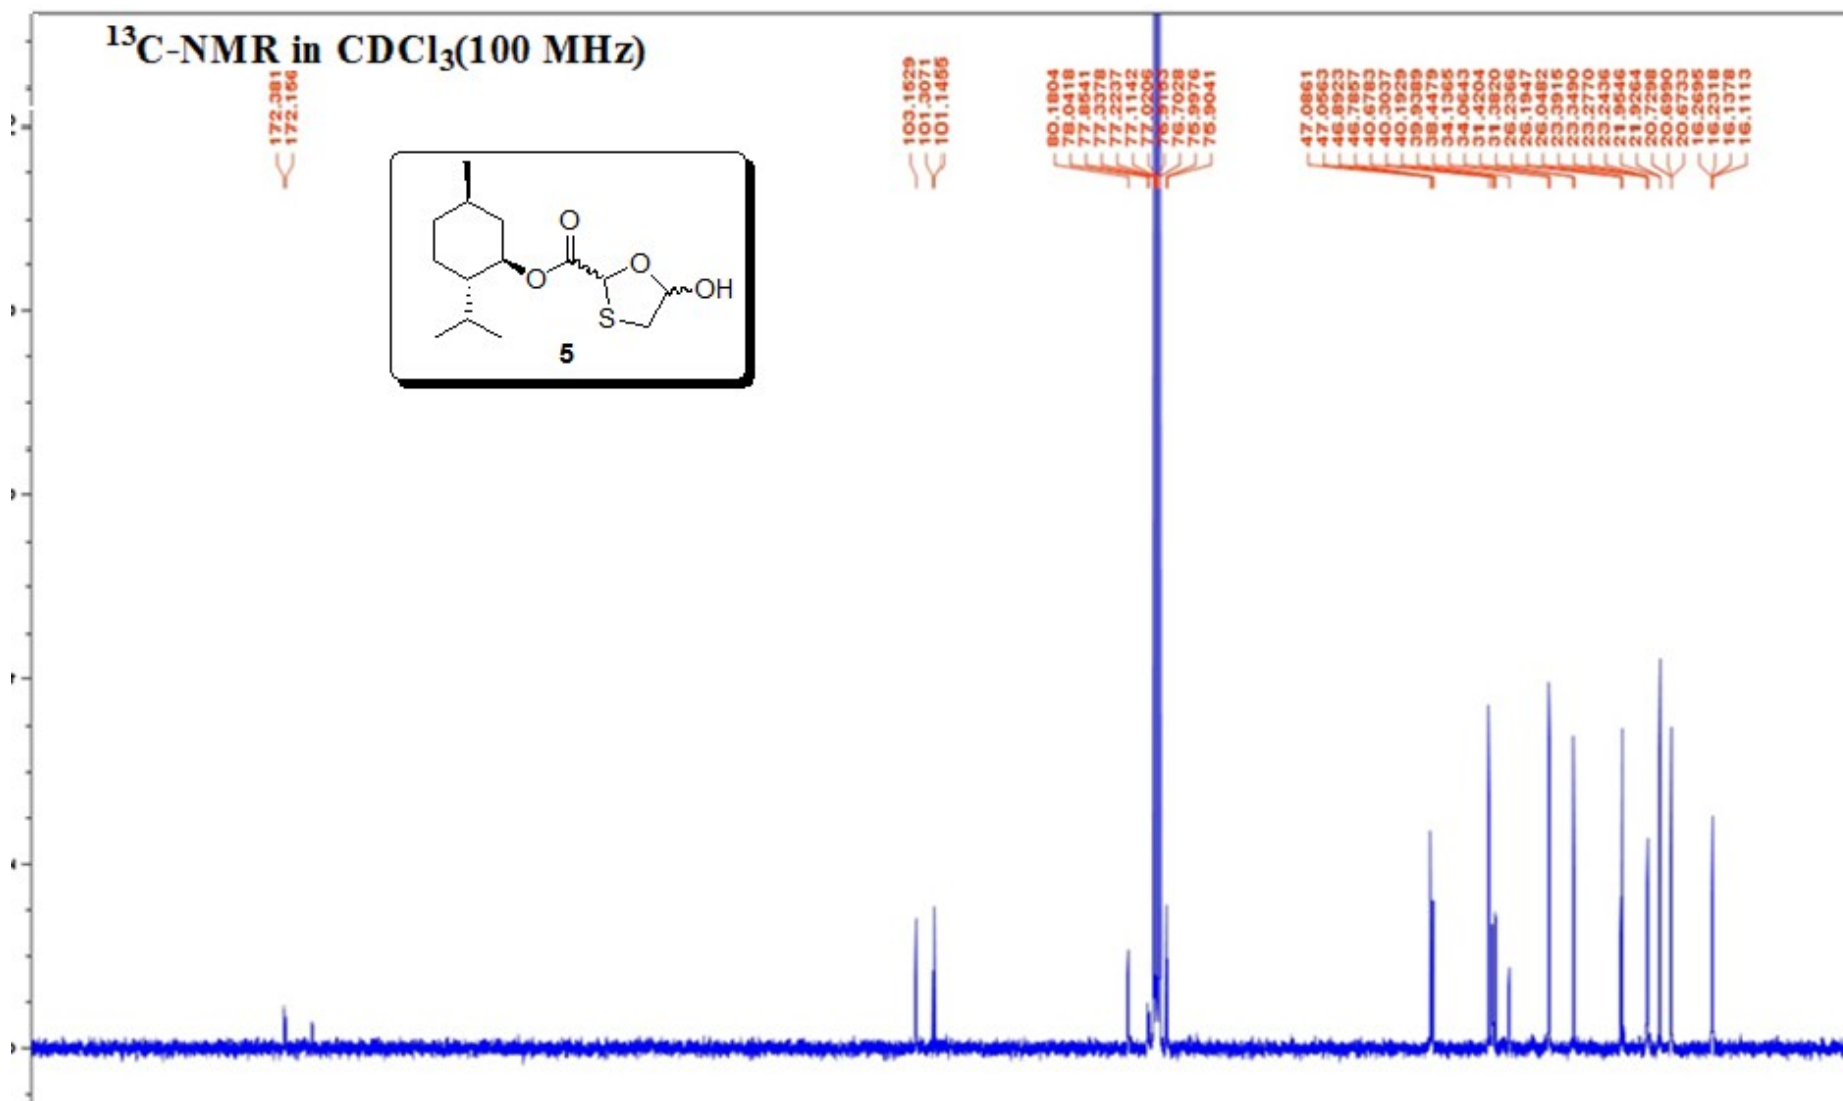

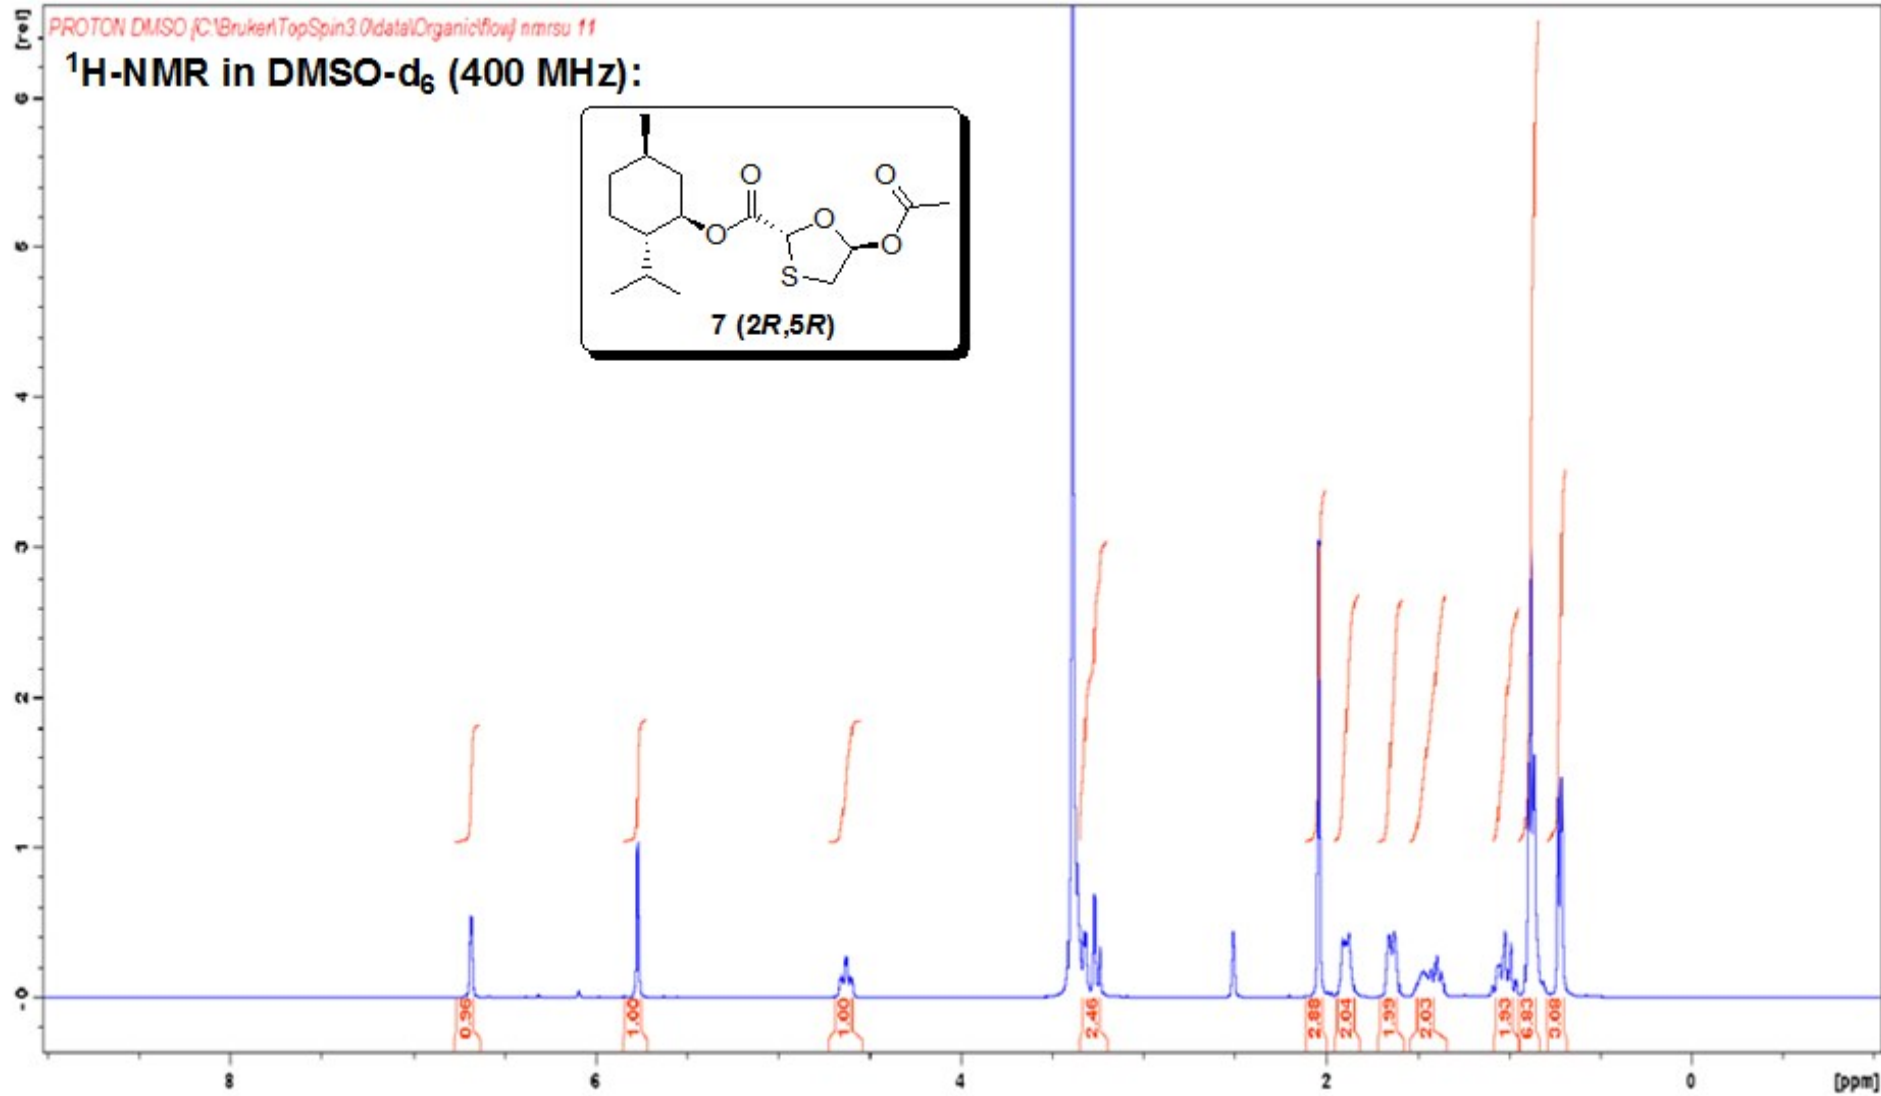

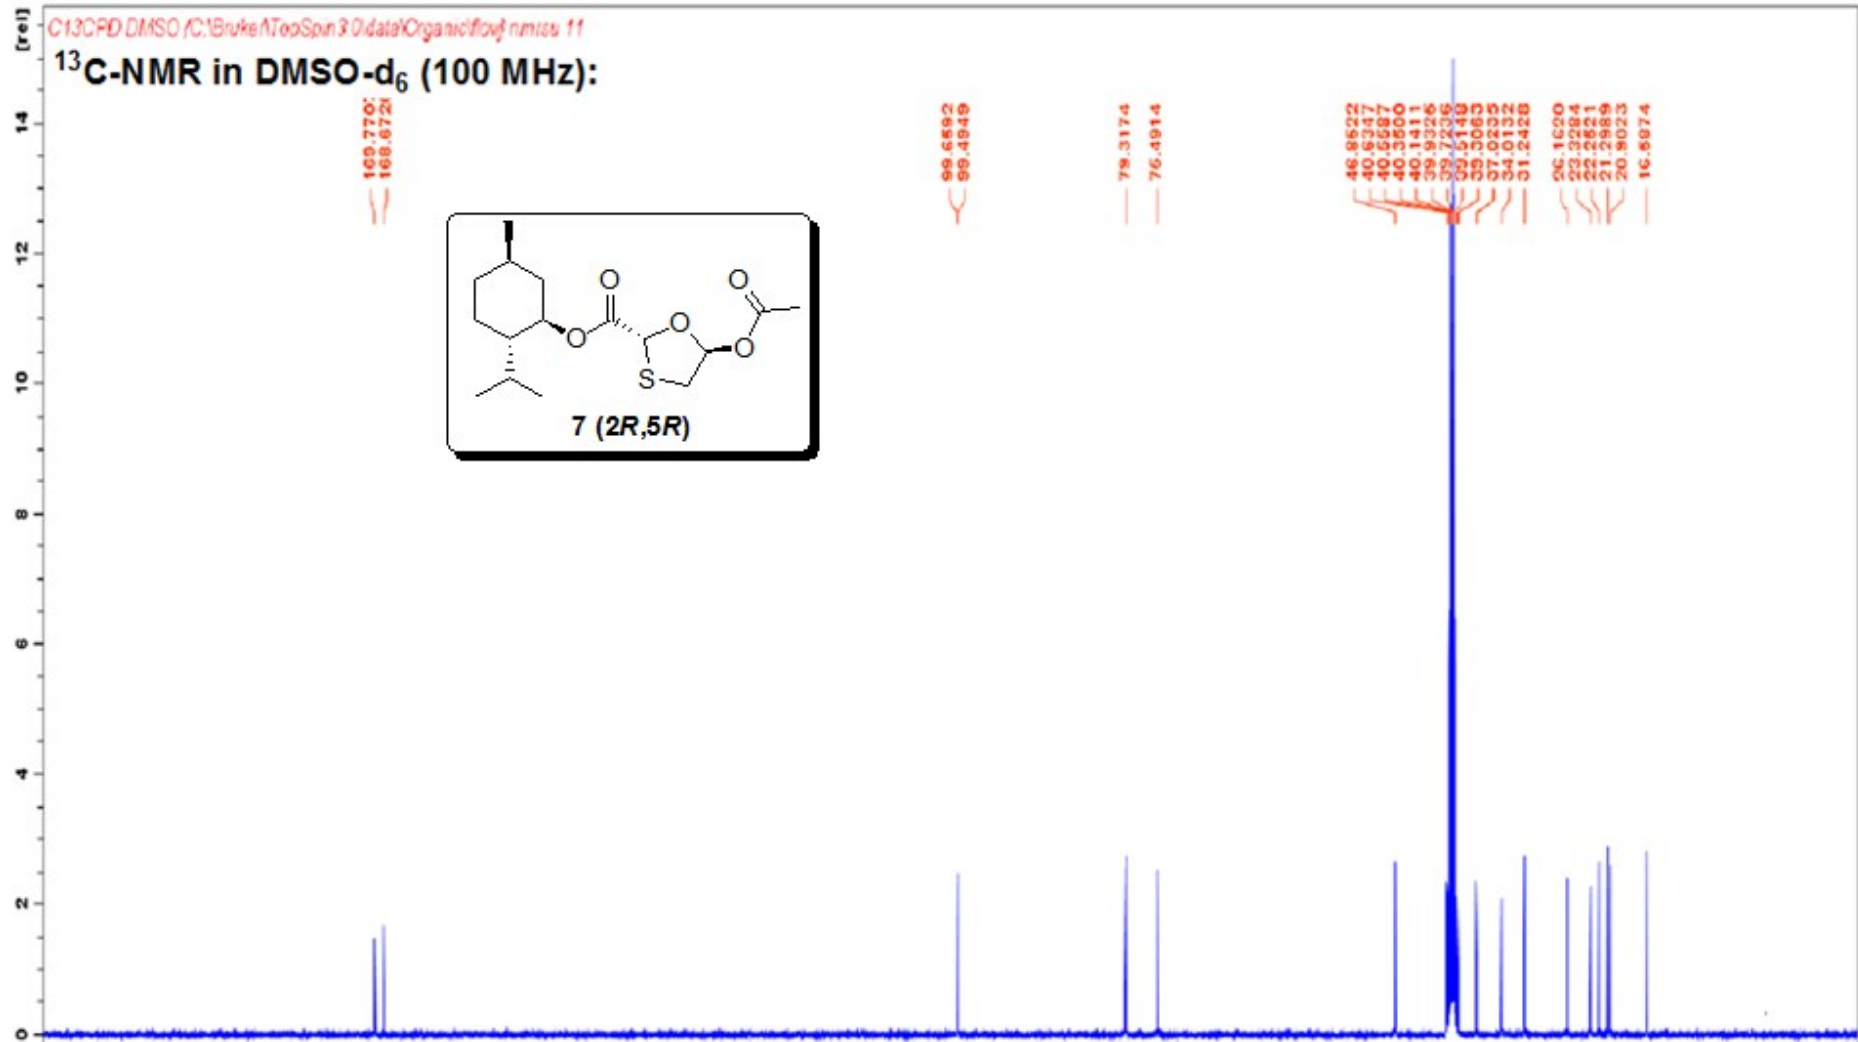

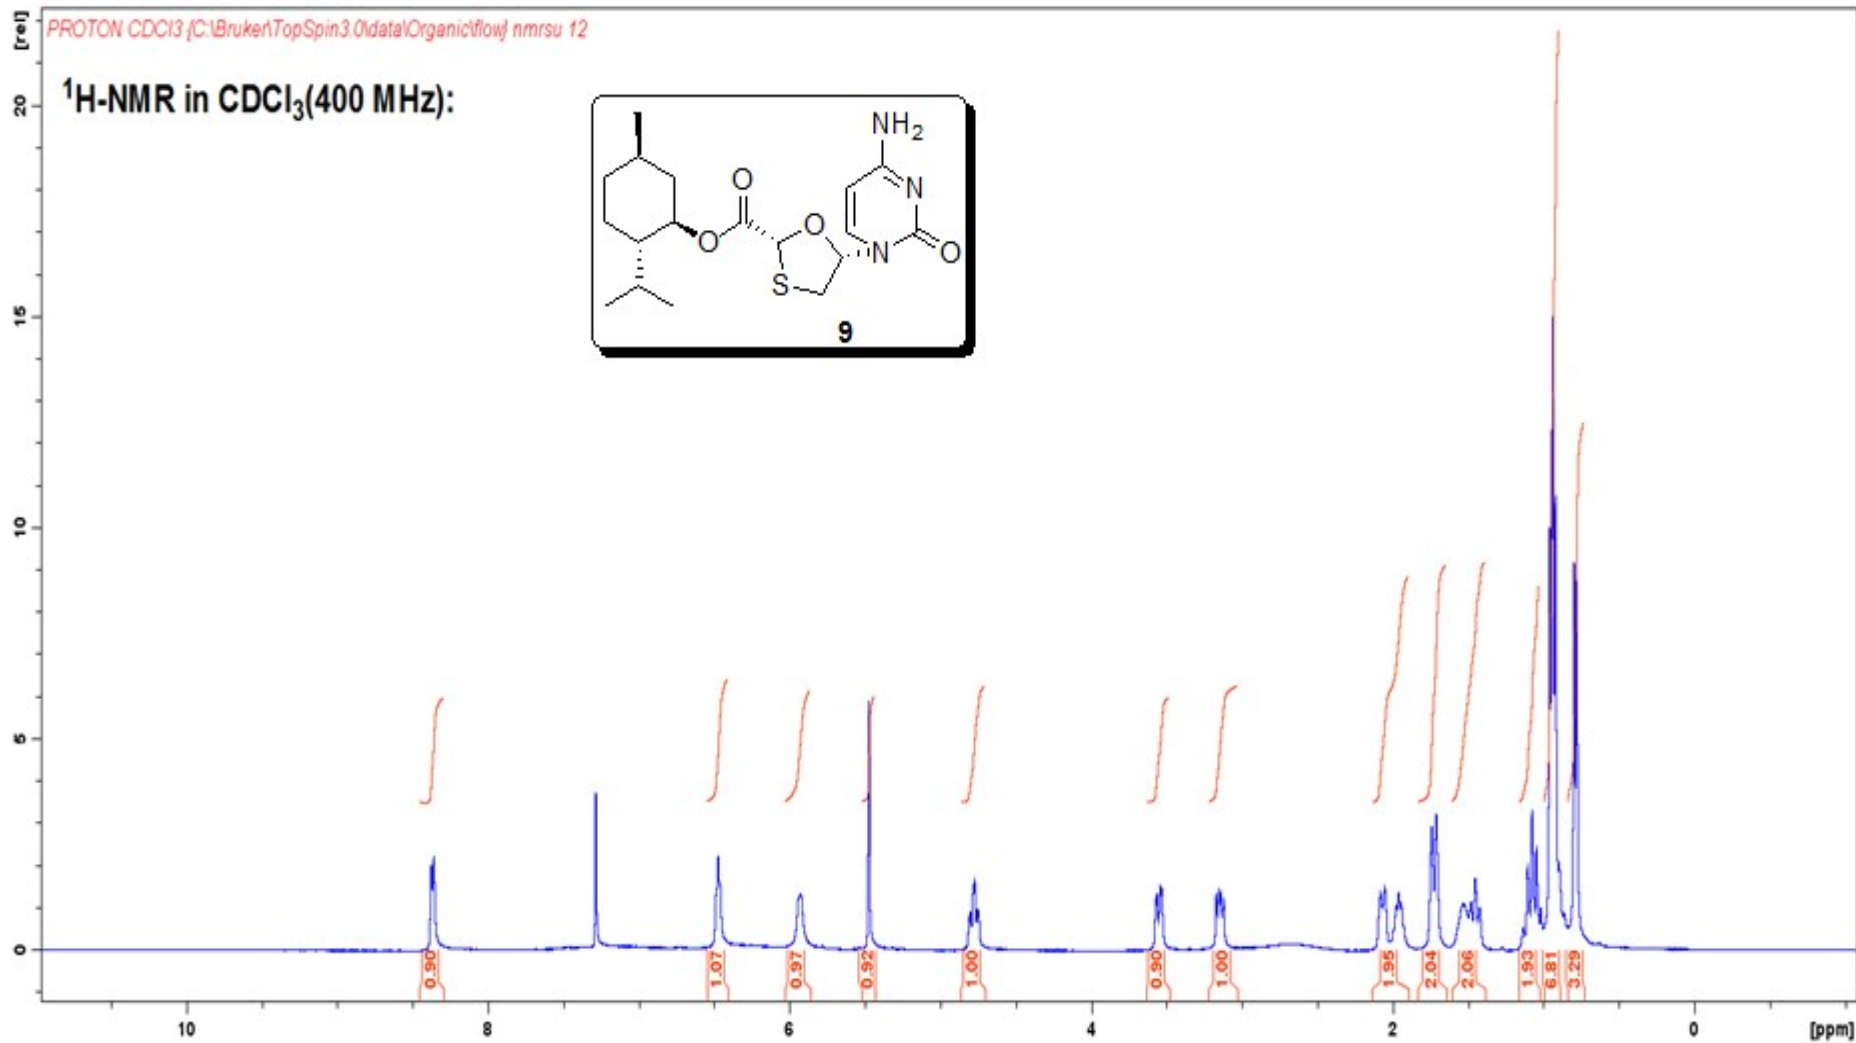

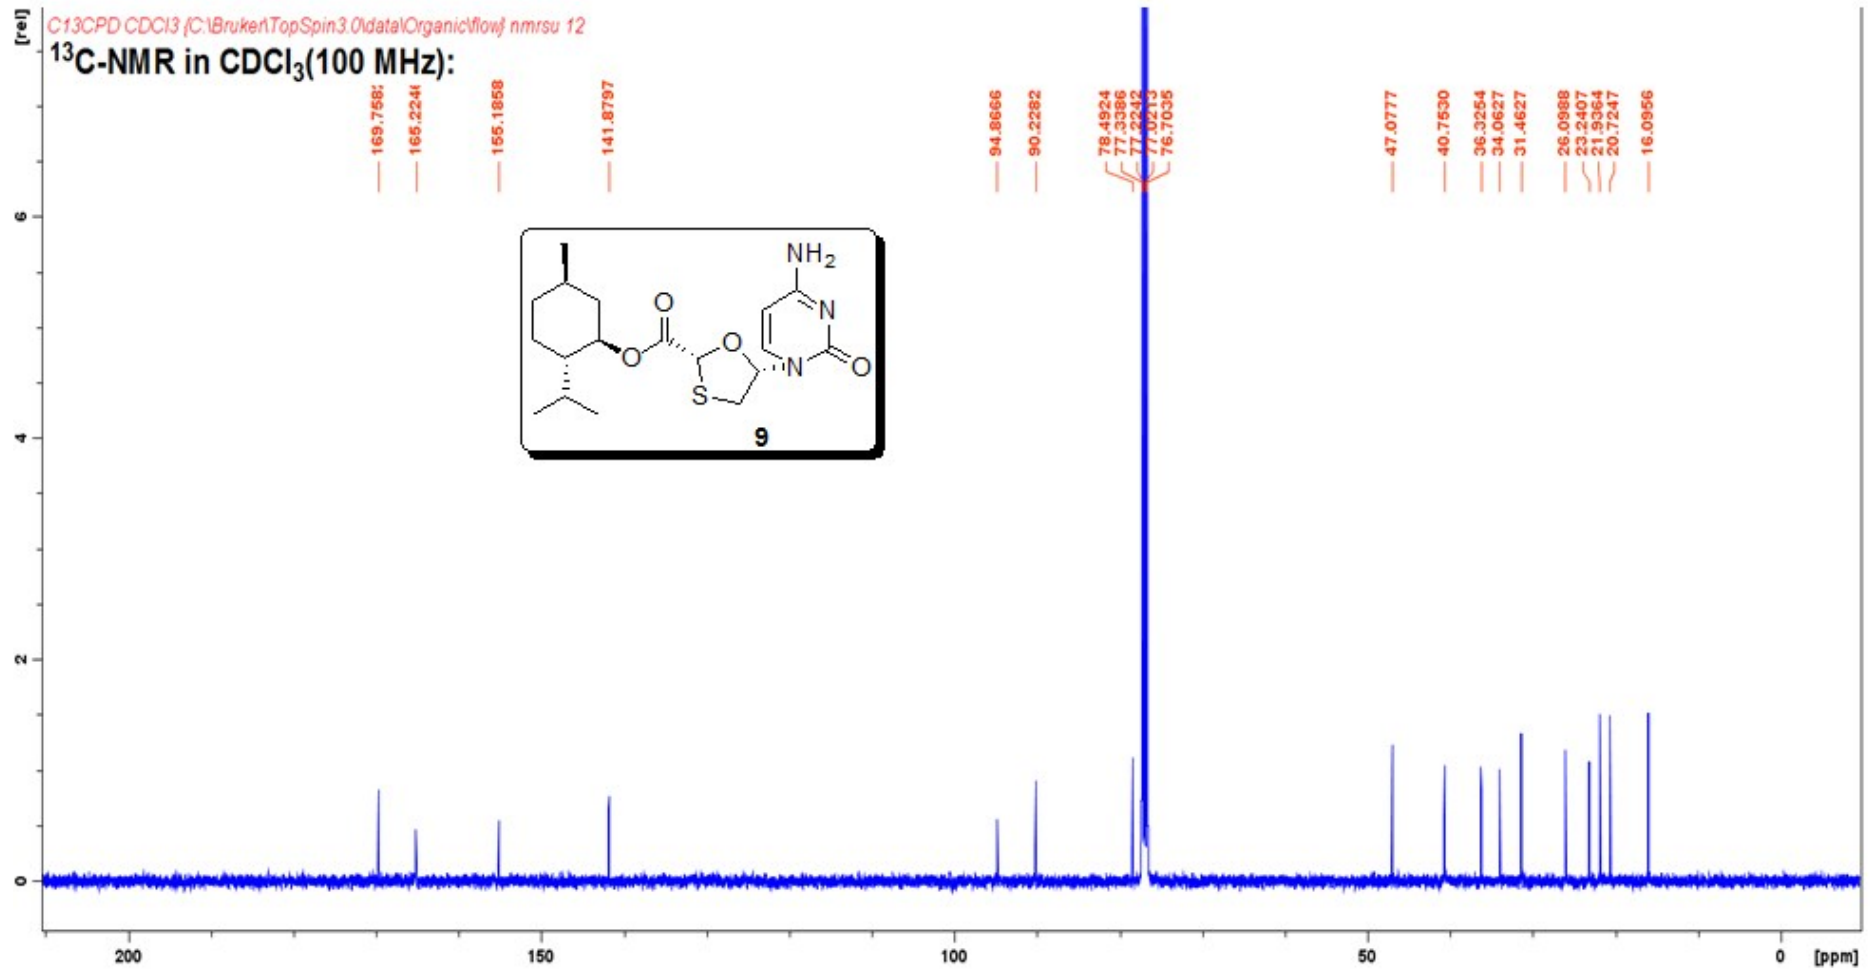

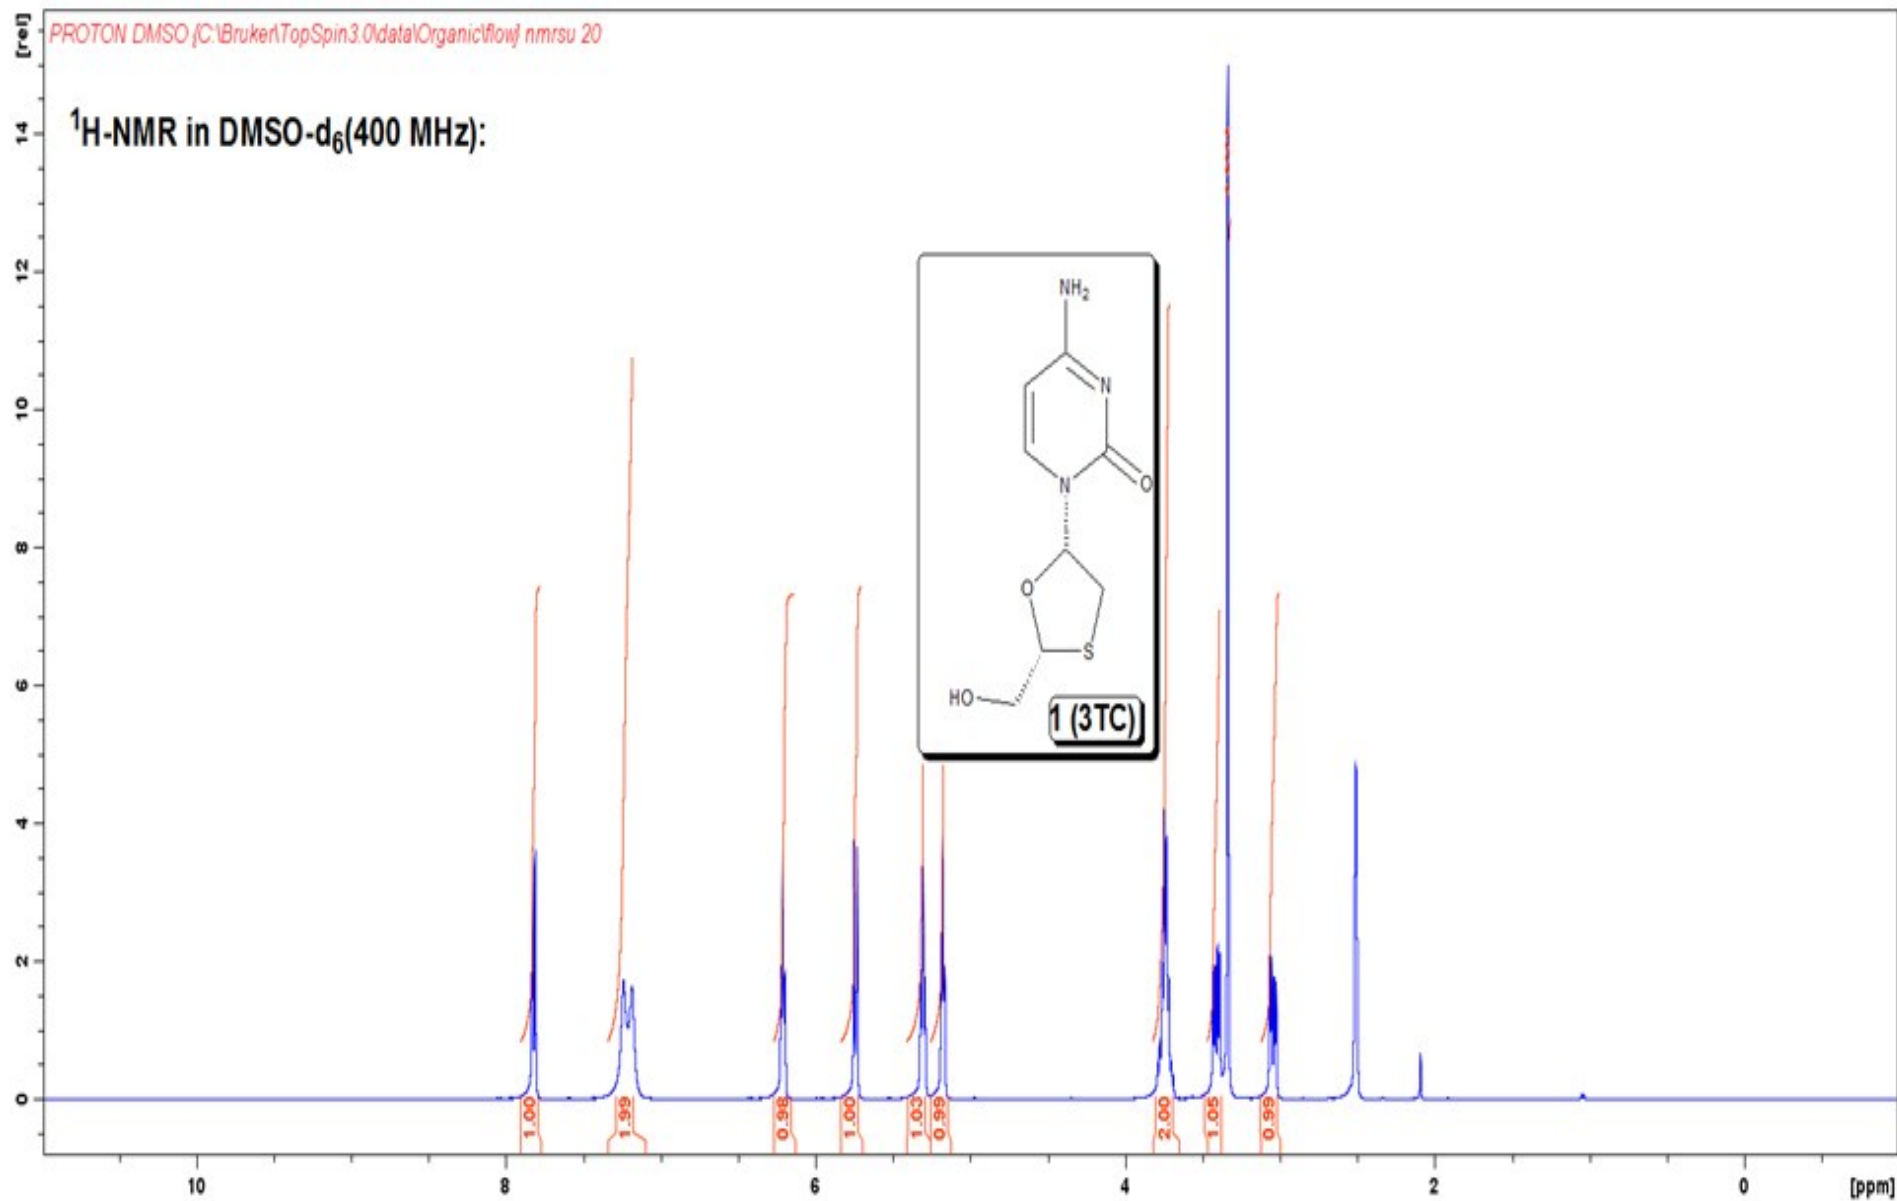



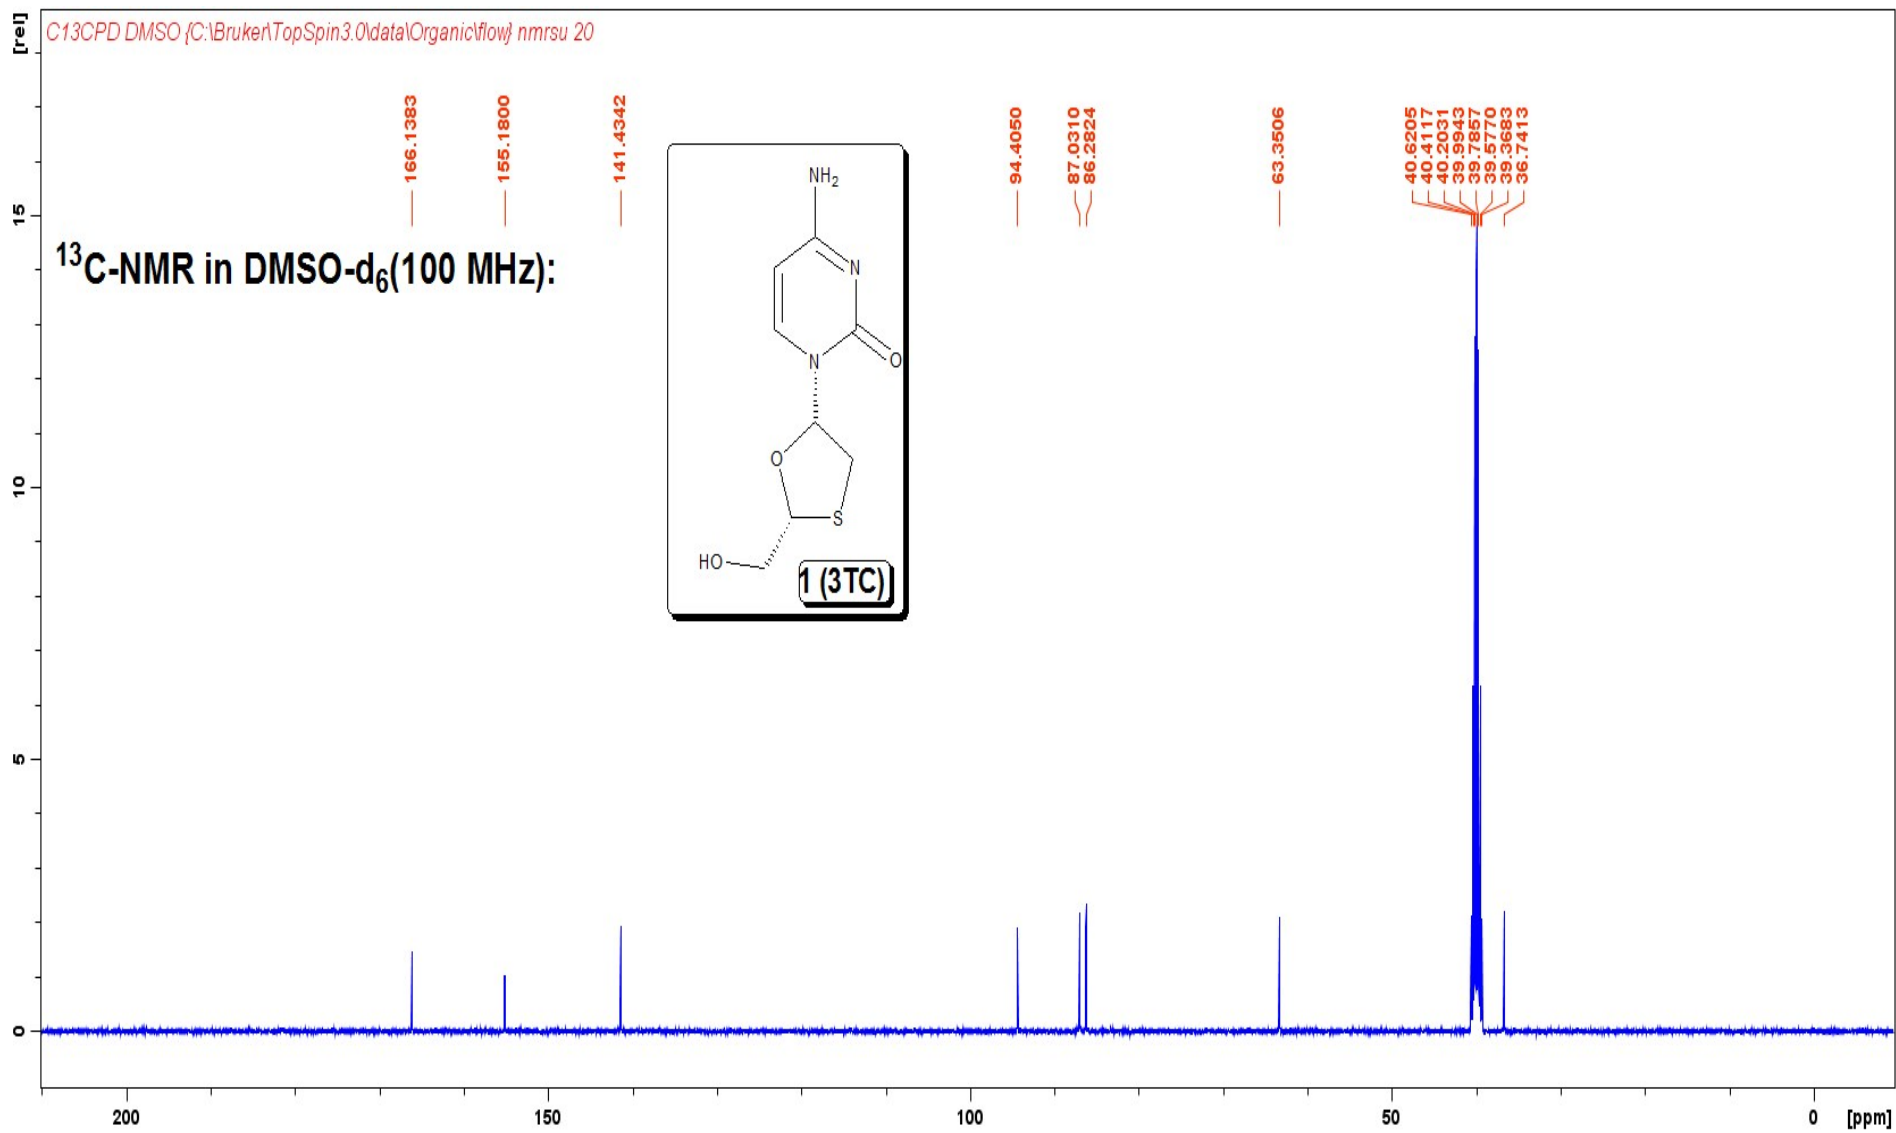

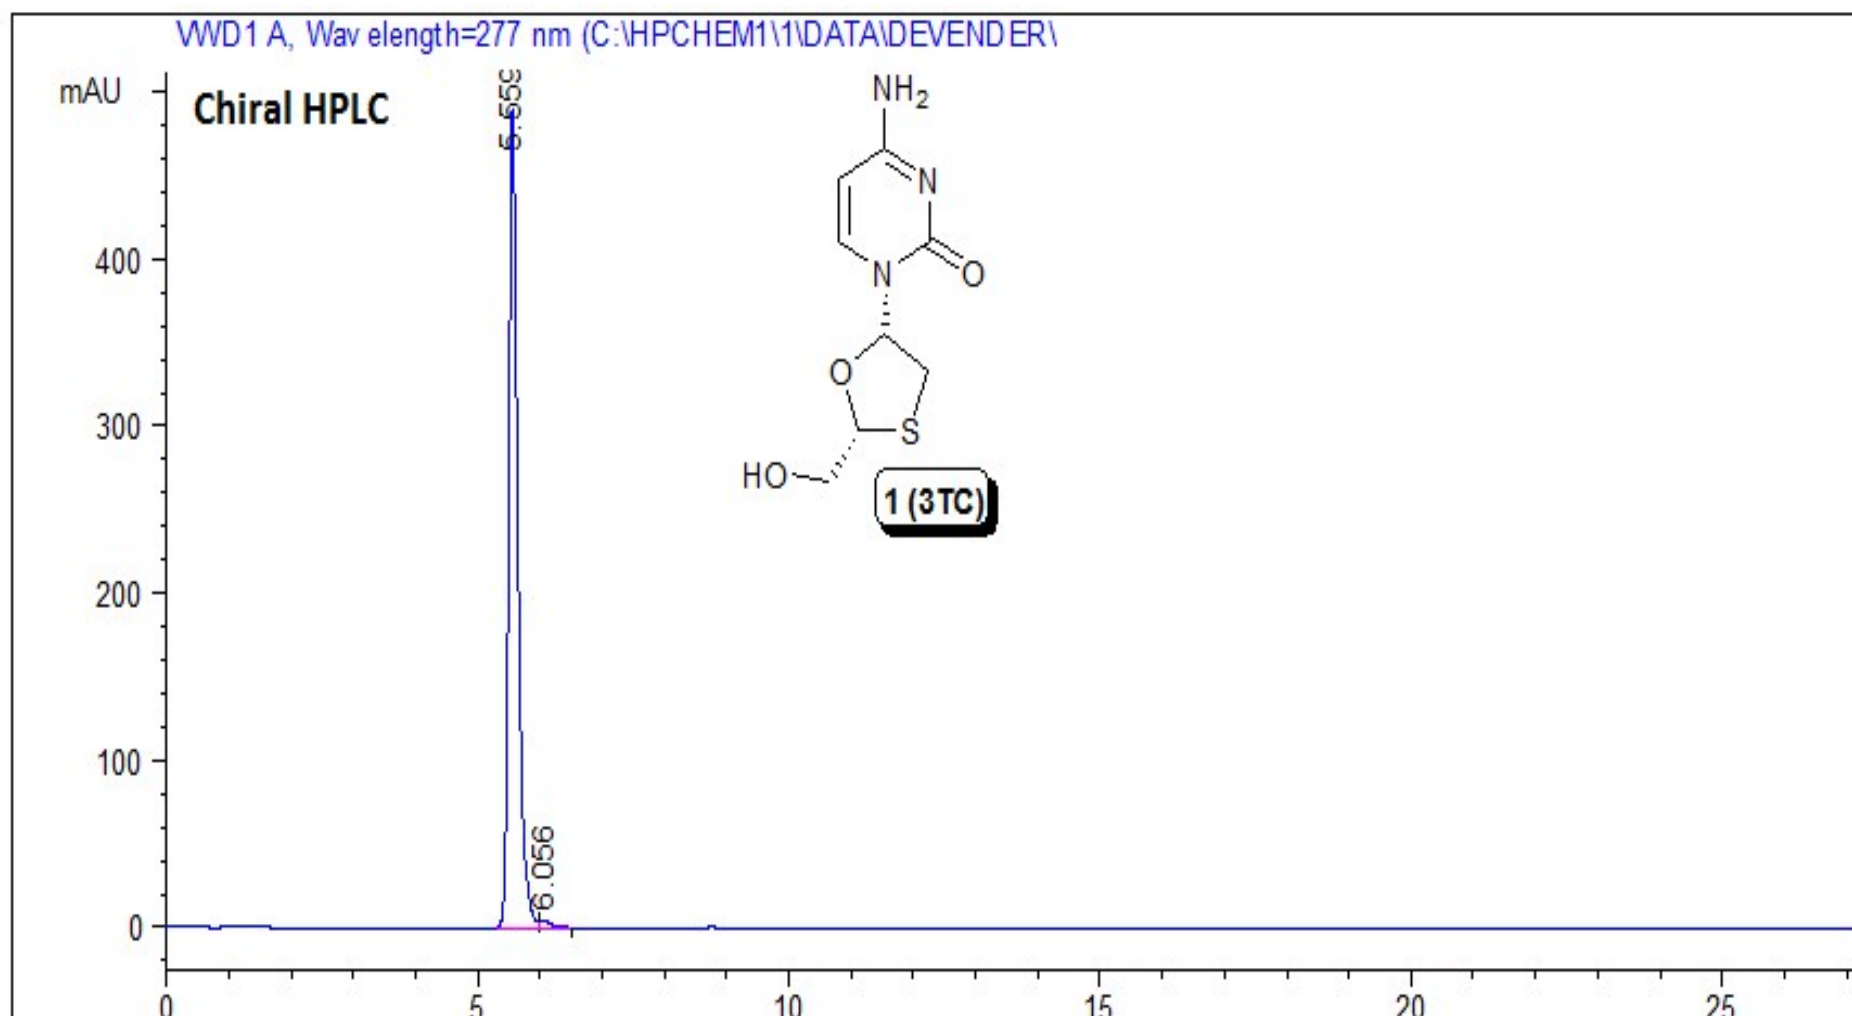

Supplement: c7ob00480j1.pdf [file c7ob00480j1.pdf]
